# Supplementary material for: Perceptions of postnatal depression and health care needs in a South African sample: the “mental” in maternal health care
Source: Springer Nature journal article supplement (doi:10.1186/s12905-014-0140-7), 2014-11-11
Supplement: MOESM1 [file 9754682]

| Demographic | N | Percentage |
| --- | --- | --- |
| Age |  |  |
| Below 21 | 0 | 0 |
| 21 -30 | 10 | 50 |
| 31-40 | 9 | 45 |
| 41-59 | 1 | 5 |
|  |  |  |
| Level of education |  |  |
| No formal schooling | 0 | 0 |
| Primary | 15 | 75 |
| Secondary | 2 | 10 |
| Tertiary | 3 | 15 |
|  |  |  |
| Marital status |  |  |
| Married | 5 | 25 |
| Cohabiting | 10 | 50 |
| Single | 5 | 25 |
|  |  |  |
| Employment status |  |  |
| Employed | 4 | 20 |
| Unemployed | 16 | 80 |
|  |  |  |
| Sources of income |  |  |
| Salary only | 8 | 40 |
| Salaries and social grants | 5 | 25 |
| Pension and other social grants | 2 | 10 |
| Social Grants only | 2 | 10 |
| Social grants and other sources such as families | 1 | 5 |
| No minimum income (rely on families and other sources) | 2 | 10 |

Table 1
